# Supplementary figures and images for: Significant social networks of women victims of childhood sexual abuse
Source: Preprints.org preprint supplement (doi:10.20944/preprints202309.2176.v1), 2023-10-02

*Figure 2. Significant Social Networks Map for the research participants.*


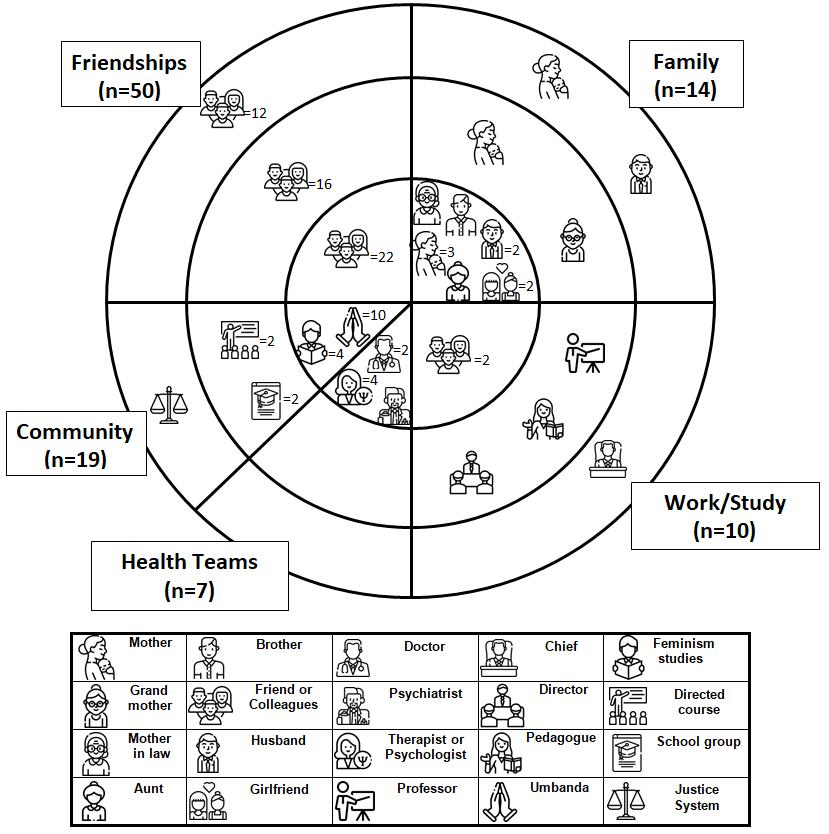


4.

Supplement: Supplementary file 1 [file supplementary]
